# Supplementary material for: Single-cell analysis reveals prognostic fibroblast subpopulations linked to molecular and immunological subtypes of lung cancer
Source: PubMed Central journal article supplement (PMC9889778; doi:10.1038/s41467-023-35832-6), 2023-01-31
Supplement: 41467_2023_35832_MOESM3_ESM.pdf [file 41467_2023_35832_MOESM3_ESM.pdf]

# Single-cell analysis reveals prognostic fibroblast subpopulations linked to molecular and immunological subtypes of lung cancer

## Description of Additional Supplementary Files

File name: Supplementary Data 1

Description: Single-cell RNA-seq dataset clinicopathological information

File name: Supplementary Data 2

Description: Fibroblast subpopulation differential expression analysis results.

File name: Supplementary Data 3

Description: Fibroblast subpopulation REACTOME Pathway GSVA results.

File name: Supplementary Data 4

Description: Fibroblast subpopulation CAF gene signature GSVA results.

File name: Supplementary Data 5

Description: Intra fibroblast subpopulation control vs tumour differential expression analysis results.

File name: Supplementary Data 6

Description: Additional mxIHC images related to Figure 3b.

File name: Supplementary Data 7

Description: MxIHC dataset clinicopathological information.

File name: Supplementary Data 8

Description: Whole slide images H&E stained tissue sections for all NSCLC cases analysed by mxIHC.

File name: Supplementary Data 9

Description: Additional mxIHC images related to Figure 3c&d (LUAD)

File name: Supplementary Data 10

Description: Additional mxIHC images related to Figure 3c&d (LUSC)

File name: Supplementary Data 11

Description: Signature Matrix for CIBERSORTx mediated digital cytometry analysis.

File name: Supplementary Data 12

Description: Trajectory analysis differential expression analysis results.

File name: Supplementary Data 13

Description: Trajectory analysis Consensus module REACTOME pathway enrichment analysis.

File name: Supplementary Data 14

Description: Clinical and molecular features of bulk transcriptome datasets analysed, including digital cytometry results.

File name: Supplementary Data 15

Description: Additional mxIHC images showing solid morphology regions of LUAD tumour sections.

File name: Supplementary Data 16

Description: Gene list used for fibroblast dataset integration.
