# Supplementary material for: Single-cell analysis reveals prognostic fibroblast subpopulations linked to molecular and immunological subtypes of lung cancer
Source: PubMed Central journal article supplement (PMC9889778; doi:10.1038/s41467-023-35832-6), 2023-01-31

**Supplementary Data 8: Whole slide images H&E stained tissue sections for all NSCLC cases analysed by mxIHC**

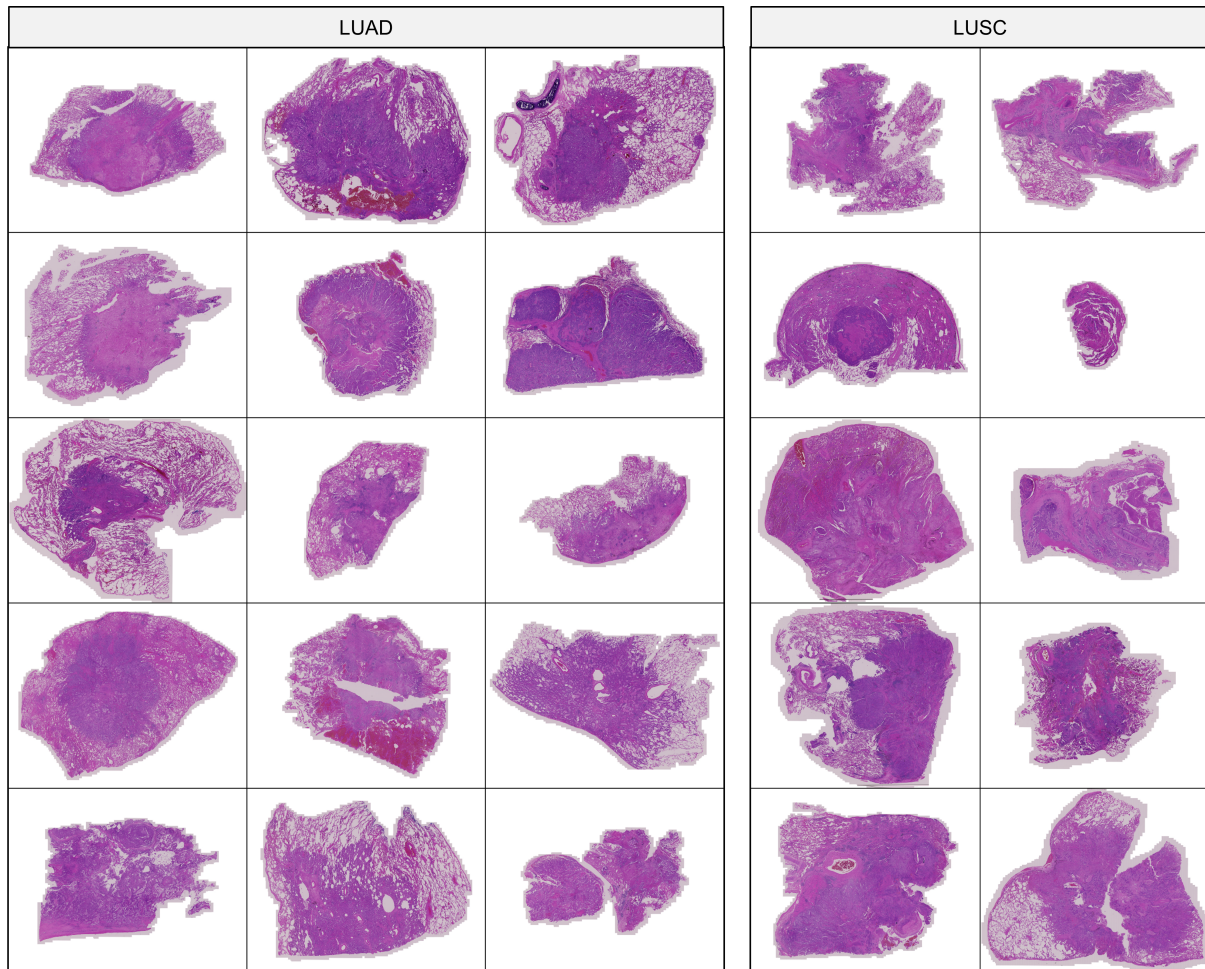

Supplement: 41467_2023_35832_MOESM11_ESM.pdf [file 41467_2023_35832_MOESM11_ESM.pdf]
