# Supplementary material for: Single-cell analysis reveals prognostic fibroblast subpopulations linked to molecular and immunological subtypes of lung cancer
Source: PubMed Central journal article supplement (PMC9889778; doi:10.1038/s41467-023-35832-6), 2023-01-31
Supplement: 41467_2023_35832_MOESM13_ESM.pdf [file 41467_2023_35832_MOESM13_ESM.pdf]

**Supplementary Data 10: Additional mxIHC images related to Figure 3d (LUSC)**

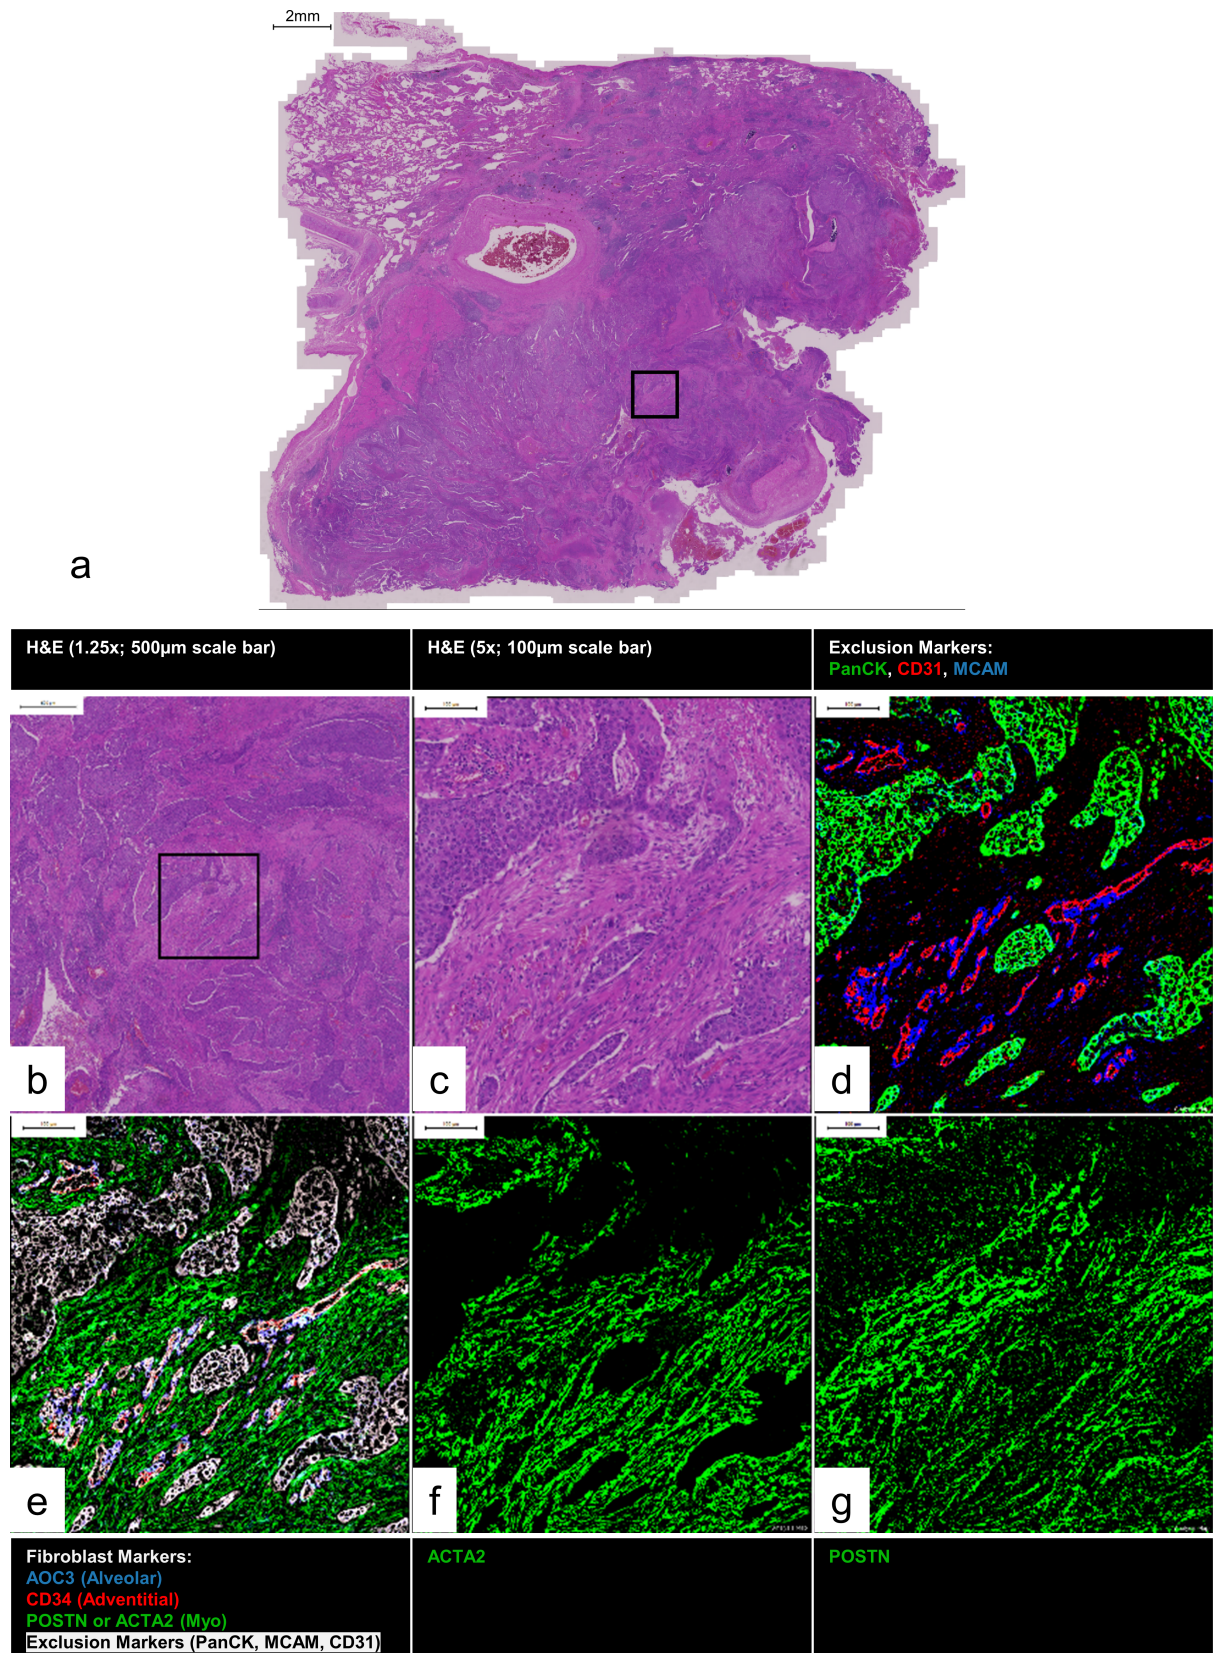

a) Whole slide image of H&E stained control lung tissue, indicating region of interest (ROI) displayed in panel b. Scale bar represents 2mm.

- b) Micrograph of ROI selected from panel a, indicating ROI displayed in panels c-g.
- c-g) Micrographs showing H&E and mxIHC from serial sections. Coloured as described in the associated key.
- c) Shows the H&E image with no markup
- d) Shows a pseudo immunofluorescence (pIF) image from mxIHC staining for exclusion markers individually coloured.
- e) Shows a pseudo immunofluorescence (pIF) image from mxIHC staining for fibroblast markers (in red, green and blue) and exclusion markers (all coloured white) as indicated in the key.
- f) Shows myo marker ACTA2 staining individually
- g) Shows myo marker POSTN staining individually
